# Supplementary material for: National policy development for cotrimoxazole prophylaxis in Malawi, Uganda and Zambia: the relationship between Context, Evidence and Links
Source: PubMed Central journal article supplement (PMC3121137; doi:10.1186/1478-4505-9-s1-s6), 2011-06-16
Supplement: 1478-4505-9-S1-S6-S1.pdf [file 1478-4505-9-S1-S6-S1.pdf]

## Additional file 1 Key events in policy and research

| Year | International                                                                                                                                                                   | Malawi                                                                                                                                                                                                                                                                                                                                                                                                                                      | Uganda                                                                                                                                                                          | Zambia                                                   |
|------|---------------------------------------------------------------------------------------------------------------------------------------------------------------------------------|---------------------------------------------------------------------------------------------------------------------------------------------------------------------------------------------------------------------------------------------------------------------------------------------------------------------------------------------------------------------------------------------------------------------------------------------|---------------------------------------------------------------------------------------------------------------------------------------------------------------------------------|----------------------------------------------------------|
| 1998 | Anglaret et al present results of trial demonstrating efficacy of CPT for HIV related illness in Cote d'Ivoire at the XIIth World AIDS Conference, Geneva (Abstr LB 12464) [8]. | ProTEST study begins examining feasibility of combining HIV and TB services.                                                                                                                                                                                                                                                                                                                                                                |                                                                                                                                                                                 |                                                          |
| 1999 | Wiktor et al and Anglaret et al publish papers in the Lancet demonstrating efficacy of CPT for HIV related illness in Cote d'Ivoire at an early disease stage [7-8].            | <p>Boeree et al's trial on CPT for HIV infected TB patients begins [11].</p> <p>Senior researchers at the College of Medicine write to the Lancet warning that Cote D'Ivoire studies may not be applicable to the whole of Africa [36].</p> <p>UNAIDS stops funding Boeree et al's trial. The study is redesigned and continues [11].</p> <p>Zacharia et al's study in Thyolo on the efficacy of CPT for HIV + TB patients begins [17].</p> |                                                                                                                                                                                 |                                                          |
| 2000 | WHO/UNAIDS publish provisional recommendations that CPT be provided to adults and children across Africa[29].                                                                   | Mwaungulu et al's study on the efficacy of CPT for HIV+ TB patients begins [15].                                                                                                                                                                                                                                                                                                                                                            | <p>Government rejects CDC/Uganda request to implement CPT in TASO clinics, asks for further data on its efficacy in Uganda.</p> <p>Watera et al study into CPT begins [16].</p> | Nunn et al's trial into CPT for HIV+ TB patients begins. |
| 2001 |                                                                                                                                                                                 |                                                                                                                                                                                                                                                                                                                                                                                                                                             | Mermin et al study into CPT and safe water for HIV+ adults begins [13, 16].                                                                                                     | Chintu et al's trial into CPT for HIV+ children begins.  |

|      |                                                                                              |                                                                                                                                                                                                                                                                                                                                                  |                                                                                                                                               |                                                                                                                                      |
|------|----------------------------------------------------------------------------------------------|--------------------------------------------------------------------------------------------------------------------------------------------------------------------------------------------------------------------------------------------------------------------------------------------------------------------------------------------------|-----------------------------------------------------------------------------------------------------------------------------------------------|--------------------------------------------------------------------------------------------------------------------------------------|
| 2002 |                                                                                              | <p>Van Oosterhout et al's study on incidence of severe events (hospitalizations and deaths) and clinical illness episodes among HIV infected adults that could potentially be prevented by CPT begins [35].</p> <p><b>POLICY CHANGE:<br/>Government adopts policy of CPT to HIV infected TB patients, based on results of local studies.</b></p> |                                                                                                                                               |                                                                                                                                      |
| 2003 |                                                                                              | Zacharia et al publish results demonstrating the efficacy of CPT for HIV infected TB patients [17].                                                                                                                                                                                                                                              | Following dissemination meeting at the Ministry of Health, government allows for CPT to be implemented by TASO but rejects national scale up. | Chintu et al's trial ends early due to strength of results [5].                                                                      |
| 2004 | WHO/UNAIDS/UNICEF release statement on the use of CPT for HIV exposed and infected children. | Mwaungulu et al publish results demonstrating the efficacy of CPT for HIV infected TB patients [15].                                                                                                                                                                                                                                             | Mermin et al publish study results [13].                                                                                                      | Chintu et al publish trial results [5].                                                                                              |
| 2005 |                                                                                              | <b>POLICY CHANGE:<br/>Government adopts a policy of CPT for all HIV infected adults and children and publishes guidelines.</b>                                                                                                                                                                                                                   | <b>POLICY CHANGE:<br/>Government adopts a policy of CPT for HIV+ adults and children and publishes guidelines.</b>                            |                                                                                                                                      |
| 2006 | WHO release detailed guidelines on CPT for HIV related disease in resource limited settings. |                                                                                                                                                                                                                                                                                                                                                  |                                                                                                                                               | National scale up plan states commitment to providing CPT for HIV + patients.                                                        |
| 2007 |                                                                                              |                                                                                                                                                                                                                                                                                                                                                  |                                                                                                                                               | <p><b>POLICY CHANGE: The MOH release memo instructing use of CPT in HIV clinics</b></p> <p>National guidelines on CPT published.</p> |
